# Supplementary material for: Connective Tissue Disease-Associated Pulmonary Arterial Hypertension in Southern Taiwan: A Single-Center 10-Year Longitudinal Observation Cohort
Source: MDPI journal article supplement (doi:10.3390/healthcare9050615), 2021-05-20
Supplement: s1 [file s1]

**Figure S2**

Overall survival of pulmonary arterial hypertension in patients with iPAH vs SLE-PAH.

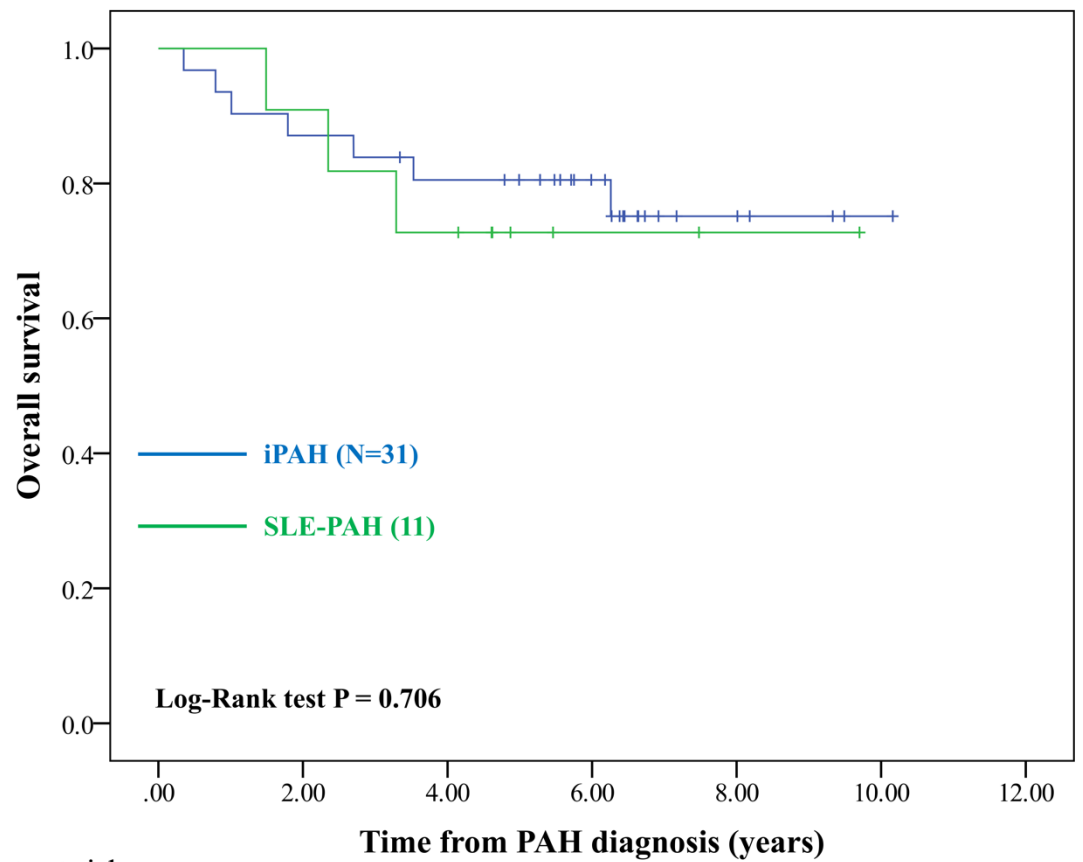

Number of patients at risk

|         |    |    |    |    |   |   |   |
|---------|----|----|----|----|---|---|---|
| iPAH    | 31 | 27 | 24 | 16 | 5 | 1 | 0 |
| SLE-PAH | 11 | 10 | 8  | 2  | 2 | 0 | 0 |
