# Supplementary figures and images for: Connective Tissue Disease-Associated Pulmonary Arterial Hypertension in Southern Taiwan: A Single-Center 10-Year Longitudinal Observation Cohort
Source: MDPI journal article supplement (doi:10.3390/healthcare9050615), 2021-05-20

**Figure S1**

Overall survival of all patients with pulmonary arterial hypertension

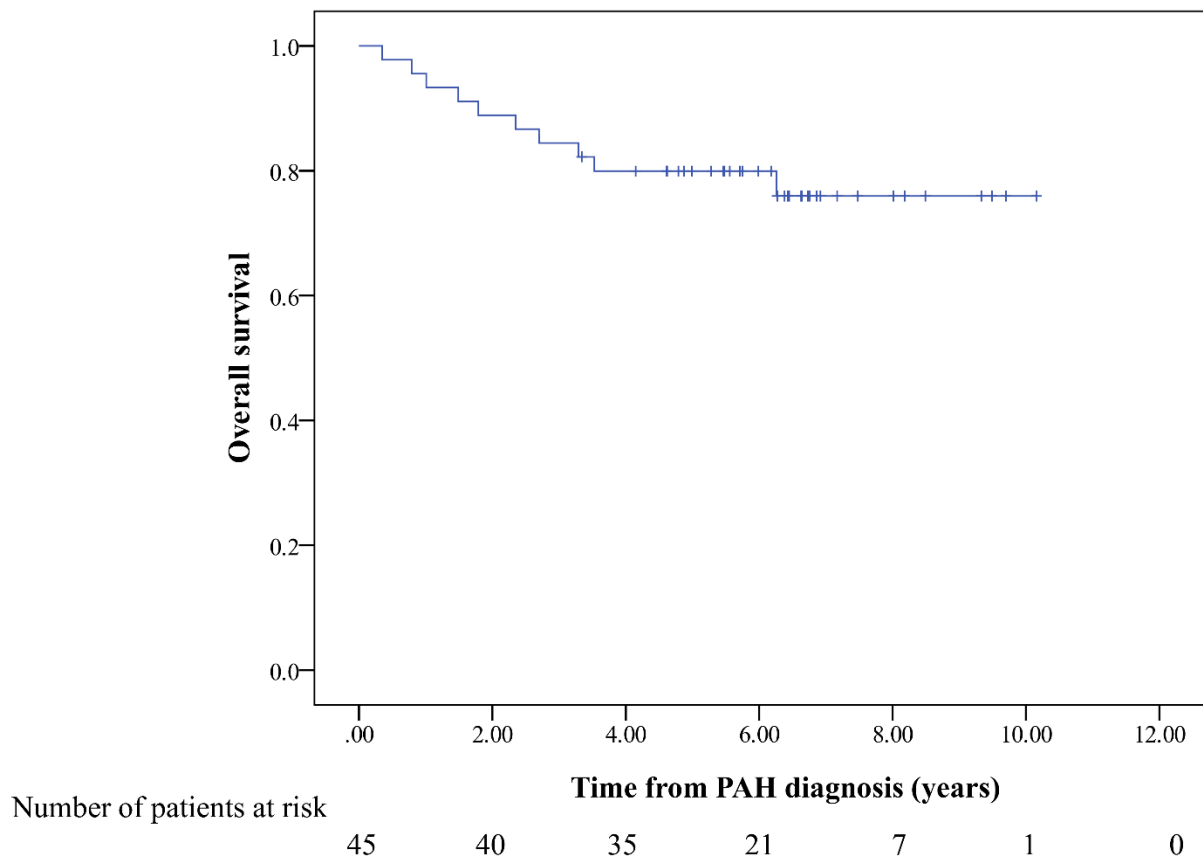

Supplement: s1 [file s1]
